# Supplementary material
Source: PubMed Central journal article supplement (PMC3711951)
Supplement: NIHMS452655-supplement-Supp_Table_S1-S4.pdf [file NIHMS452655-supplement-Supp_Table_S1-S4.pdf]

**Trends in purchases and consumption of foods and beverages containing  
caloric and low-calorie sweeteners over the last decade in the U.S.**

**Carmen Piernas, Shu Wen Ng and Barry M. Popkin**

Department of Nutrition, Gillings School of Global Public Health, University of North  
Carolina at Chapel Hill, Chapel Hill, NC

\*To Whom Correspondence should be addressed:

Barry M. Popkin

Carolina Population Center

University of North Carolina

123 W. Franklin St.

Chapel Hill, NC 27516

Phone: 919-966-1732, Fax: 919-966-9159/6638

E-mail: [popkin@unc.edu](mailto:popkin@unc.edu)

Table 1S. Trends in per capita purchases and % household purchasing foods and beverages by sweetener type, Homescan 2000-2010\*.

| PER CAPITA PURCHASES <sup>†</sup>              | YEAR   |       |       |       |       |       |       |       |       |       |       | P trend <sup>‡</sup> |
|------------------------------------------------|--------|-------|-------|-------|-------|-------|-------|-------|-------|-------|-------|----------------------|
|                                                | 2000   | 2001  | 2002  | 2003  | 2004  | 2005  | 2006  | 2007  | 2008  | 2009  | 2010  |                      |
| <b>BEVERAGES – Households with children</b>    |        |       |       |       |       |       |       |       |       |       |       |                      |
| LCS only                                       | 74.9   | 75.5  | 83.4  | 91.6  | 94.7  | 100.1 | 100.3 | 94.5  | 91.2  | 90.7  | 93.3  | 0.000                |
| CS only                                        | 290.2  | 290.0 | 293.7 | 289.1 | 273.9 | 264.5 | 263.4 | 252.8 | 251.0 | 246.1 | 242.3 | 0.000                |
| LCS and CS                                     | 20.8   | 23.3  | 25.2  | 27.7  | 34.7  | 43.8  | 47.8  | 52.4  | 54.4  | 62.2  | 61.7  | 0.000                |
| <b>BEVERAGES – Households without children</b> |        |       |       |       |       |       |       |       |       |       |       |                      |
| LCS only                                       | 94.8   | 95.4  | 103.3 | 111.4 | 114.6 | 120.0 | 120.2 | 114.4 | 111.0 | 110.6 | 113.2 | 0.000                |
| CS only                                        | 279.3  | 279.1 | 282.8 | 278.2 | 263.0 | 253.6 | 252.5 | 241.8 | 240.1 | 235.2 | 231.4 | 0.000                |
| LCS and CS                                     | 23.0   | 25.5  | 27.4  | 29.8  | 36.8  | 45.9  | 50.0  | 54.6  | 56.5  | 64.4  | 63.9  | 0.000                |
| <b>FOODS – Households with children</b>        |        |       |       |       |       |       |       |       |       |       |       |                      |
| LCS only                                       | 0.9    | 1.1   | 1.4   | 1.4   | 1.8   | 2.2   | 2.3   | 2.2   | 2.3   | 2.9   | 2.5   | 0.000                |
| CS only                                        | 173.5  | 177.6 | 181.6 | 184.2 | 181.8 | 182.3 | 186.3 | 184.0 | 183.2 | 183.6 | 180.9 | 0.000                |
| LCS and CS                                     | 4.8    | 5.5   | 6.2   | 7.7   | 10.2  | 11.7  | 11.3  | 12.1  | 12.5  | 12.5  | 13.0  | 0.000                |
| <b>FOODS – Households without children</b>     |        |       |       |       |       |       |       |       |       |       |       |                      |
| LCS only                                       | 1.3    | 1.5   | 1.7   | 1.8   | 2.1   | 2.6   | 2.6   | 2.6   | 2.6   | 3.3   | 2.8   | 0.000                |
| CS only                                        | 186.5  | 190.5 | 194.6 | 197.1 | 194.7 | 195.3 | 199.2 | 196.9 | 196.2 | 196.5 | 193.8 | 0.000                |
| LCS and CS                                     | 6.3    | 7.0   | 7.7   | 9.2   | 11.7  | 13.2  | 12.8  | 13.6  | 14.0  | 14.0  | 14.5  | 0.000                |
| % HOUSEHOLDS PURCHASING <sup>†</sup>           | 2000   | 2001  | 2002  | 2003  | 2004  | 2005  | 2006  | 2007  | 2008  | 2009  | 2010  | P trend <sup>‡</sup> |
| <b>BEVERAGES – Households with children</b>    |        |       |       |       |       |       |       |       |       |       |       |                      |
| LCS only                                       | 50.6%  | 51.1% | 52.6% | 55.5% | 57.8% | 60.9% | 61.8% | 60.2% | 57.7% | 57.3% | 57.4% | 0.000                |
| CS only                                        | 99.5%  | 99.3% | 99.4% | 99.4% | 99.2% | 99.1% | 99.0% | 98.8% | 98.8% | 98.7% | 98.7% | 0.000                |
| LCS and CS                                     | 41.1%  | 43.5% | 42.5% | 48.8% | 58.4% | 62.7% | 64.7% | 65.6% | 66.5% | 68.4% | 69.1% | 0.000                |
| <b>BEVERAGES – Households without children</b> |        |       |       |       |       |       |       |       |       |       |       |                      |
| LCS only                                       | 53.3%  | 53.8% | 55.3% | 58.2% | 60.4% | 63.5% | 64.3% | 62.8% | 60.3% | 59.9% | 60.0% | 0.000                |
| CS only                                        | 98.5%  | 98.1% | 98.2% | 98.3% | 97.6% | 97.3% | 97.0% | 96.6% | 96.5% | 96.2% | 96.2% | 0.000                |
| LCS and CS                                     | 33.3%  | 35.6% | 34.6% | 40.6% | 50.2% | 54.6% | 56.8% | 57.7% | 58.7% | 60.8% | 61.5% | 0.000                |
| <b>FOODS – Households with children</b>        |        |       |       |       |       |       |       |       |       |       |       |                      |
| LCS only                                       | 6.9%   | 8.2%  | 9.8%  | 10.6% | 12.4% | 14.0% | 14.5% | 14.1% | 14.0% | 18.0% | 17.1% | 0.000                |
| CS only                                        | 100.0% | 99.9% | 99.9% | 99.9% | 99.9% | 99.9% | 99.9% | 99.9% | 99.9% | 99.9% | 99.9% | 0.752                |
| LCS and CS                                     | 47.9%  | 50.8% | 52.4% | 57.7% | 63.8% | 66.6% | 66.6% | 69.1% | 70.2% | 71.2% | 71.5% | 0.000                |
| <b>FOODS – Households without children</b>     |        |       |       |       |       |       |       |       |       |       |       |                      |
| LCS only                                       | 7.8%   | 9.3%  | 11.1% | 11.9% | 14.0% | 15.7% | 16.3% | 15.9% | 15.8% | 20.1% | 19.1% | 0.000                |
| CS only                                        | 100.0% | 99.9% | 99.9% | 99.9% | 99.9% | 99.9% | 99.8% | 99.8% | 99.9% | 99.8% | 99.8% | 0.000                |
| LCS and CS                                     | 41.9%  | 44.8% | 46.4% | 51.7% | 58.1% | 61.0% | 61.1% | 63.7% | 65.0% | 66.0% | 66.3% | 0.000                |

\* Means per capita for beverages (mL/d) and foods (g/d). LCS, low-caloric sweetened beverages or foods; CS, caloric-sweetened beverages or foods.

† Multivariable linear (per capita estimates) and logistic (% purchasing) regression models were used to adjust for household size, race and income.

‡ Statistically significant linear trends were tested using Wald tests,  $P < 0.001$ .

Table 2S. Trends in prevalence and per capita intake of beverages and foods by sweetener type, NHANES 2003-2010\*.

| <i>Per Capita Intake</i> <sup>†</sup> | STORE   |         |         |         |                  | TOTAL   |         |         |         |                  |
|---------------------------------------|---------|---------|---------|---------|------------------|---------|---------|---------|---------|------------------|
|                                       | 2003-04 | 2005-06 | 2007-08 | 2009-10 | <i>P</i> trend ‡ | 2003-04 | 2005-06 | 2007-08 | 2009-10 | <i>P</i> trend ‡ |
| <b>Children 2-18-y</b>                |         |         |         |         |                  |         |         |         |         |                  |
| LCS Beverages                         | 30.7    | 39.3    | 69.4    | 69.9    | 0.000            | 42.7    | 46.8    | 83.2    | 76.8    | 0.001            |
| CS Beverages                          | 417.9   | 368.1   | 294.8   | 314.5   | 0.000            | 616.2   | 539.6   | 473.7   | 460.0   | 0.000            |
| LCS Foods                             | 2.8     | 3.2     | 1.8     | 2.5     | 0.529            | 2.8     | 3.4     | 2.2     | 3.6     | 0.757            |
| CS Foods                              | 110.3   | 107.0   | 98.5    | 98.7    | 0.014            | 141.1   | 145.2   | 132.2   | 133.4   | 0.019            |
| <b>Adults ≥ 19-y</b>                  |         |         |         |         |                  |         |         |         |         |                  |
| LCS Beverages                         | 125.6   | 163.0   | 161.3   | 151.1   | 0.138            | 172.4   | 214.2   | 204.4   | 184.5   | 0.716            |
| CS Beverages                          | 369.7   | 325.0   | 337.3   | 325.6   | 0.098            | 536.4   | 468.6   | 463.3   | 441.0   | 0.002            |
| LCS Foods                             | 4.3     | 8.2     | 5.1     | 7.1     | 0.143            | 4.4     | 8.5     | 5.4     | 7.3     | 0.137            |
| CS Foods                              | 90.5    | 89.8    | 89.1    | 90.0    | 0.871            | 120.2   | 120.1   | 116.2   | 114.8   | 0.125            |
| <i>% Consumers</i> <sup>†</sup>       | STORE   |         |         |         |                  | TOTAL   |         |         |         |                  |
|                                       | 2003-04 | 2005-06 | 2007-08 | 2009-10 | <i>P</i> trend ‡ | 2003-04 | 2005-06 | 2007-08 | 2009-10 | <i>P</i> trend ‡ |
| <b>Children 2-18-y</b>                |         |         |         |         |                  |         |         |         |         |                  |
| LCS Beverages                         | 6.4%    | 8.4%    | 14.8%   | 17.1%   | 0.000            | 7.8%    | 10.3%   | 17.0%   | 18.9%   | 0.000            |
| CS Beverages                          | 65.7%   | 56.0%   | 54.2%   | 52.8%   | 0.000            | 80.6%   | 72.4%   | 72.2%   | 71.7%   | 0.001            |
| LCS Foods                             | 1.5%    | 1.8%    | 1.2%    | 1.8%    | 0.848            | 1.5%    | 1.9%    | 1.4%    | 2.3%    | 0.357            |
| CS Foods                              | 62.2%   | 61.5%   | 57.0%   | 57.2%   | 0.025            | 73.4%   | 73.7%   | 70.6%   | 70.8%   | 0.060            |
| <b>Adults ≥ 19-y</b>                  |         |         |         |         |                  |         |         |         |         |                  |
| LCS Beverages                         | 17.7%   | 21.8%   | 21.3%   | 21.6%   | 0.010            | 21.1%   | 26.2%   | 24.8%   | 24.9%   | 0.037            |
| CS Beverages                          | 47.8%   | 42.8%   | 44.0%   | 42.4%   | 0.007            | 59.5%   | 53.6%   | 54.7%   | 52.1%   | 0.000            |
| LCS Foods                             | 2.4%    | 4.6%    | 3.3%    | 4.1%    | 0.048            | 2.6%    | 4.9%    | 3.5%    | 4.3%    | 0.058            |
| CS Foods                              | 50.9%   | 48.7%   | 49.9%   | 51.0%   | 0.756            | 61.4%   | 61.1%   | 60.0%   | 59.6%   | 0.206            |

\* Per capita means for beverages (mL/d) and foods (g/d). LCS, low-caloric sweetened beverages or foods; CS, caloric-sweetened beverages or foods

† Multivariable linear (per capita estimates) and logistic (% purchasing) regression models were used to adjust for age, gender, race and income

‡ Statistically significant linear trends were tested using Wald tests, *P*<0.05

Table 3S. Change in percent volume (mL/day) purchased from each type of beverage using estimated average marginal effects from random-effects longitudinal regression models, among U.S. households from the Nielsen Homescan Longitudinal dataset, 2000-2010.

| BEVERAGES<br>Predictors          | LCS only† |         |       |          | CS only† |         |       |          | LCS and CS |         |      |          |
|----------------------------------|-----------|---------|-------|----------|----------|---------|-------|----------|------------|---------|------|----------|
|                                  | β         | [95%CI] |       | P value‡ | β        | [95%CI] |       | P value‡ | β          | [95%CI] |      | P value‡ |
| <b>Year</b>                      |           |         |       |          |          |         |       |          |            |         |      |          |
| 2001                             | -0.1      | -0.3    | 0.1   | 0.476    | -1.2     | -1.5    | -1.0  | 0.000    | 0.5        | 0.3     | 0.6  | 0.000    |
| 2002                             | 0.7       | 0.5     | 0.9   | 0.000    | -2.3     | -2.6    | -2.1  | 0.000    | 0.3        | 0.2     | 0.5  | 0.000    |
| 2003                             | 1.5       | 1.3     | 1.7   | 0.000    | -4.6     | -4.8    | -4.3  | 0.000    | 0.9        | 0.7     | 1.0  | 0.000    |
| 2004                             | 2.6       | 2.4     | 2.8   | 0.000    | -7.5     | -7.8    | -7.3  | 0.000    | 2.4        | 2.3     | 2.6  | 0.000    |
| 2005                             | 3.3       | 3.1     | 3.5   | 0.000    | -10.5    | -10.8   | -10.3 | 0.000    | 3.6        | 3.5     | 3.8  | 0.000    |
| 2006                             | 2.9       | 2.7     | 3.1   | 0.000    | -11.9    | -12.1   | -11.6 | 0.000    | 4.4        | 4.2     | 4.5  | 0.000    |
| 2007                             | 2.3       | 2.1     | 2.5   | 0.000    | -13.0    | -13.2   | -12.7 | 0.000    | 5.6        | 5.4     | 5.7  | 0.000    |
| 2008                             | 1.6       | 1.4     | 1.8   | 0.000    | -12.8    | -13.0   | -12.6 | 0.000    | 6.2        | 6.1     | 6.4  | 0.000    |
| 2009                             | 1.4       | 1.2     | 1.6   | 0.000    | -12.9    | -13.1   | -12.6 | 0.000    | 7.3        | 7.1     | 7.4  | 0.000    |
| 2010                             | 1.7       | 1.5     | 1.9   | 0.000    | -13.4    | -13.7   | -13.2 | 0.000    | 7.5        | 7.4     | 7.7  | 0.000    |
| <b>Gender and age categories</b> |           |         |       |          |          |         |       |          |            |         |      |          |
| Female                           |           |         |       |          |          |         |       |          |            |         |      |          |
| 2-6 y-old                        | -0.5      | -0.8    | -0.2  | 0.002    | 1.4      | 1.1     | 1.8   | 0.000    | -0.3       | -0.5    | 0.0  | 0.026    |
| 7-12 y-old                       | -0.4      | -0.7    | -0.2  | 0.001    | 0.4      | 0.1     | 0.7   | 0.015    | 0.3        | 0.1     | 0.5  | 0.002    |
| 13-18 y-old                      | -0.7      | -1.0    | -0.5  | 0.000    | 0.3      | -0.1    | 0.6   | 0.110    | 0.2        | 0.0     | 0.3  | 0.134    |
| Male                             |           |         |       |          |          |         |       |          |            |         |      |          |
| 2-6 y-old                        | -0.7      | -1.0    | -0.4  | 0.000    | 1.5      | 1.1     | 1.9   | 0.000    | -0.2       | -0.5    | 0.0  | 0.042    |
| 7-12 y-old                       | -0.7      | -1.0    | -0.5  | 0.000    | 0.8      | 0.5     | 1.1   | 0.000    | 0.1        | -0.1    | 0.3  | 0.185    |
| 13-18 y-old                      | -1.6      | -1.8    | -1.3  | 0.000    | 2.0      | 1.7     | 2.4   | 0.000    | 0.0        | -0.2    | 0.2  | 0.830    |
| Female                           |           |         |       |          |          |         |       |          |            |         |      |          |
| 19-39 y-old                      | -0.4      | -0.6    | -0.2  | 0.000    | -0.1     | -0.4    | 0.1   | 0.318    | 0.3        | 0.2     | 0.4  | 0.000    |
| 40-59 y-old                      | 1.1       | 0.9     | 1.3   | 0.000    | -2.2     | -2.5    | -2.0  | 0.000    | 0.6        | 0.5     | 0.8  | 0.000    |
| >60 y-old                        | 1.1       | 0.8     | 1.3   | 0.000    | -1.7     | -2.0    | -1.4  | 0.000    | 0.4        | 0.2     | 0.5  | 0.000    |
| Male                             |           |         |       |          |          |         |       |          |            |         |      |          |
| 19-39 y-old                      | -1.8      | -2.0    | -1.6  | 0.000    | 2.6      | 2.4     | 2.8   | 0.000    | -0.4       | -0.5    | -0.3 | 0.000    |
| 40-59 y-old                      | 0.0       | -0.2    | 0.2   | 0.839    | 1.3      | 1.1     | 1.5   | 0.000    | -0.5       | -0.6    | -0.3 | 0.000    |
| >60 y-old                        | 1.0       | 0.7     | 1.2   | 0.000    | 0.7      | 0.4     | 1.0   | 0.000    | -0.6       | -0.8    | -0.5 | 0.000    |
| <b>Presence of children</b>      |           |         |       |          |          |         |       |          |            |         |      |          |
| Presence vs. Absence             | -1.8      | -2.1    | -1.6  | 0.000    | 3.0      | 2.6     | 3.3   | 0.000    | -0.4       | -0.7    | -0.2 | 0.000    |
| <b>Race/ethnicity</b>            |           |         |       |          |          |         |       |          |            |         |      |          |
| African-American vs. White       | -12.0     | -12.5   | -11.6 | 0.000    | 9.3      | 8.8     | 9.8   | 0.000    | -0.6       | -0.8    | -0.3 | 0.000    |
| Hispanic vs. White               | -5.3      | -5.8    | -4.8  | 0.000    | 3.9      | 3.3     | 4.5   | 0.000    | -1.0       | -1.3    | -0.6 | 0.000    |
| Other vs. White                  | -5.9      | -6.6    | -5.3  | 0.000    | 5.8      | 5.0     | 6.6   | 0.000    | -2.1       | -2.5    | -1.7 | 0.000    |
| <b>Income</b>                    |           |         |       |          |          |         |       |          |            |         |      |          |
| Middle vs. Low Income            | 1.2       | 1.0     | 1.3   | 0.000    | -2.0     | -2.2    | -1.8  | 0.000    | 0.4        | 0.3     | 0.6  | 0.000    |
| High vs. Low Income              | 2.7       | 2.5     | 2.9   | 0.000    | -4.6     | -4.8    | -4.3  | 0.000    | 0.9        | 0.8     | 1.1  | 0.000    |

---

**Race/ethnicity-Presence of children**

## No Children

|                            |       |       |       |       |     |     |      |       |      |      |      |       |
|----------------------------|-------|-------|-------|-------|-----|-----|------|-------|------|------|------|-------|
| African-American vs. White | -12.6 | -13.1 | -12.2 | 0.000 | 9.8 | 9.2 | 10.3 | 0.000 | -0.6 | -0.9 | -0.3 | 0.000 |
| Hispanic vs. White         | -5.6  | -6.2  | -5.0  | 0.000 | 4.1 | 3.4 | 4.8  | 0.000 | -1.0 | -1.3 | -0.6 | 0.000 |
| Other vs. White            | -6.0  | -6.8  | -5.3  | 0.000 | 5.9 | 5.0 | 6.7  | 0.000 | -2.1 | -2.6 | -1.7 | 0.000 |

## Children

|                            |       |       |      |       |     |     |     |       |      |      |      |       |
|----------------------------|-------|-------|------|-------|-----|-----|-----|-------|------|------|------|-------|
| African-American vs. White | -10.4 | -11.0 | -9.9 | 0.000 | 7.8 | 7.2 | 8.5 | 0.000 | -0.6 | -1.0 | -0.3 | 0.000 |
| Hispanic vs. White         | -4.5  | -5.1  | -3.9 | 0.000 | 3.4 | 2.6 | 4.1 | 0.000 | -0.9 | -1.3 | -0.5 | 0.000 |
| Other vs. White            | -5.6  | -6.4  | -4.8 | 0.000 | 5.7 | 4.7 | 6.7 | 0.000 | -2.1 | -2.6 | -1.6 | 0.000 |

---

**Race/ethnicity-Income**

## Low income

|                            |       |       |       |       |     |     |     |       |      |      |      |       |
|----------------------------|-------|-------|-------|-------|-----|-----|-----|-------|------|------|------|-------|
| African-American vs. White | -11.3 | -11.9 | -10.7 | 0.000 | 7.7 | 6.9 | 8.4 | 0.000 | -0.4 | -0.8 | 0.0  | 0.069 |
| Hispanic vs. White         | -5.0  | -5.8  | -4.2  | 0.000 | 3.4 | 2.5 | 4.4 | 0.000 | -0.9 | -1.5 | -0.4 | 0.001 |
| Other vs. White            | -5.1  | -6.2  | -4.0  | 0.000 | 4.3 | 2.9 | 5.7 | 0.000 | -1.4 | -2.1 | -0.6 | 0.001 |

## Middle income

|                            |       |       |       |       |     |     |     |       |      |      |      |       |
|----------------------------|-------|-------|-------|-------|-----|-----|-----|-------|------|------|------|-------|
| African-American vs. White | -11.8 | -12.2 | -11.3 | 0.000 | 8.7 | 8.1 | 9.3 | 0.000 | -0.5 | -0.8 | -0.2 | 0.001 |
| Hispanic vs. White         | -5.3  | -5.9  | -4.7  | 0.000 | 4.0 | 3.2 | 4.7 | 0.000 | -0.8 | -1.2 | -0.4 | 0.000 |
| Other vs. White            | -5.4  | -6.2  | -4.6  | 0.000 | 5.5 | 4.5 | 6.4 | 0.000 | -2.2 | -2.7 | -1.7 | 0.000 |

## High Income

|                            |       |       |       |       |      |      |      |       |      |      |      |       |
|----------------------------|-------|-------|-------|-------|------|------|------|-------|------|------|------|-------|
| African-American vs. White | -12.7 | -13.2 | -12.2 | 0.000 | 10.6 | 10.0 | 11.2 | 0.000 | -0.8 | -1.1 | -0.4 | 0.000 |
| Hispanic vs. White         | -5.4  | -6.1  | -4.8  | 0.000 | 4.1  | 3.3  | 4.9  | 0.000 | -1.1 | -1.5 | -0.7 | 0.000 |
| Other vs. White            | -6.9  | -7.6  | -6.1  | 0.000 | 6.9  | 6.0  | 7.8  | 0.000 | -2.4 | -2.9 | -1.9 | 0.000 |

---

\* Coefficients can be interpreted as the change in the percent of grocery expenditure (volume purchased, mL/d) on each type of beverage respect to the total purchases of beverages. Changes with time, presence of different family members by age and gender, presence of children, race/ethnicity, income, and the interactions race/ethnicity with presence of children and income are shown.

† LCS, low-caloric sweetened beverages or foods; CS, caloric-sweetened beverages or foods.

‡ Significance level:  $P < 0.001$

---

Table 4S. Change in percent volume (gr/day) purchased from each type of food using estimated average marginal effects from random-effects longitudinal regression models, among U.S. households from the Nielsen Homescan Longitudinal dataset, 2000-2010.

| FOODS<br>Predictors              | LCS only <sup>†</sup> |         |                         |         | CS only <sup>†</sup> |                         |         |         | LCS and CS              |      |      |       |
|----------------------------------|-----------------------|---------|-------------------------|---------|----------------------|-------------------------|---------|---------|-------------------------|------|------|-------|
|                                  | $\beta$               | [95%CI] | P<br>value <sup>‡</sup> | $\beta$ | [95%CI]              | P<br>value <sup>‡</sup> | $\beta$ | [95%CI] | P<br>value <sup>‡</sup> |      |      |       |
| <b>Year</b>                      |                       |         |                         |         |                      |                         |         |         |                         |      |      |       |
| 2001                             | 0.1                   | 0.0     | 0.1                     | 0.000   | -0.3                 | -0.4                    | -0.2    | 0.000   | 0.2                     | 0.2  | 0.3  | 0.000 |
| 2002                             | 0.2                   | 0.2     | 0.2                     | 0.000   | -0.6                 | -0.7                    | -0.5    | 0.000   | 0.4                     | 0.3  | 0.5  | 0.000 |
| 2003                             | 0.2                   | 0.1     | 0.2                     | 0.000   | -1.3                 | -1.4                    | -1.2    | 0.000   | 1.0                     | 0.9  | 1.0  | 0.000 |
| 2004                             | 0.3                   | 0.3     | 0.4                     | 0.000   | -2.8                 | -2.9                    | -2.7    | 0.000   | 2.1                     | 2.0  | 2.2  | 0.000 |
| 2005                             | 0.4                   | 0.4     | 0.4                     | 0.000   | -3.3                 | -3.4                    | -3.2    | 0.000   | 2.4                     | 2.3  | 2.5  | 0.000 |
| 2006                             | 0.4                   | 0.4     | 0.5                     | 0.000   | -3.1                 | -3.2                    | -3.0    | 0.000   | 2.3                     | 2.2  | 2.3  | 0.000 |
| 2007                             | 0.4                   | 0.4     | 0.4                     | 0.000   | -3.7                 | -3.8                    | -3.6    | 0.000   | 2.8                     | 2.7  | 2.8  | 0.000 |
| 2008                             | 0.4                   | 0.4     | 0.4                     | 0.000   | -3.8                 | -3.9                    | -3.7    | 0.000   | 2.8                     | 2.8  | 2.9  | 0.000 |
| 2009                             | 0.7                   | 0.6     | 0.7                     | 0.000   | -4.1                 | -4.2                    | -4.0    | 0.000   | 2.8                     | 2.8  | 2.9  | 0.000 |
| 2010                             | 0.5                   | 0.5     | 0.6                     | 0.000   | -4.8                 | -4.9                    | -4.7    | 0.000   | 3.1                     | 3.0  | 3.2  | 0.000 |
| <b>Gender and age categories</b> |                       |         |                         |         |                      |                         |         |         |                         |      |      |       |
| Female                           |                       |         |                         |         |                      |                         |         |         |                         |      |      |       |
| 2-6 y-old                        | -0.1                  | -0.1    | 0.0                     | 0.003   | 0.4                  | 0.3                     | 0.6     | 0.000   | -0.2                    | -0.2 | -0.1 | 0.001 |
| 7-12 y-old                       | -0.1                  | -0.1    | 0.0                     | 0.000   | 0.6                  | 0.5                     | 0.8     | 0.000   | -0.1                    | -0.2 | 0.0  | 0.021 |
| 13-18 y-old                      | 0.0                   | 0.0     | 0.0                     | 0.386   | 0.3                  | 0.2                     | 0.4     | 0.000   | 0.0                     | -0.1 | 0.1  | 0.843 |
| Male                             |                       |         |                         |         |                      |                         |         |         |                         |      |      |       |
| 2-6 y-old                        | -0.1                  | -0.1    | 0.0                     | 0.000   | 0.5                  | 0.4                     | 0.7     | 0.000   | -0.2                    | -0.3 | -0.1 | 0.000 |
| 7-12 y-old                       | -0.1                  | -0.1    | -0.1                    | 0.000   | 0.9                  | 0.8                     | 1.0     | 0.000   | -0.1                    | -0.2 | 0.0  | 0.001 |
| 13-18 y-old                      | -0.1                  | -0.1    | 0.0                     | 0.000   | 0.8                  | 0.7                     | 0.9     | 0.000   | -0.2                    | -0.3 | -0.1 | 0.000 |
| Female                           |                       |         |                         |         |                      |                         |         |         |                         |      |      |       |
| 19-39 y-old                      | 0.0                   | 0.0     | 0.0                     | 0.155   | 0.2                  | 0.1                     | 0.3     | 0.000   | 0.1                     | 0.1  | 0.2  | 0.000 |
| 40-59 y-old                      | 0.0                   | 0.0     | 0.1                     | 0.000   | -0.4                 | -0.5                    | -0.3    | 0.000   | 0.2                     | 0.1  | 0.2  | 0.000 |
| >60 y-old                        | 0.1                   | 0.0     | 0.1                     | 0.000   | -0.8                 | -0.9                    | -0.7    | 0.000   | 0.4                     | 0.3  | 0.4  | 0.000 |
| Male                             |                       |         |                         |         |                      |                         |         |         |                         |      |      |       |
| 19-39 y-old                      | -0.2                  | -0.2    | -0.1                    | 0.000   | 1.1                  | 1.0                     | 1.2     | 0.000   | -0.4                    | -0.5 | -0.4 | 0.000 |
| 40-59 y-old                      | -0.2                  | -0.2    | -0.2                    | 0.000   | 1.0                  | 0.9                     | 1.1     | 0.000   | -0.5                    | -0.6 | -0.5 | 0.000 |
| >60 y-old                        | -0.1                  | -0.2    | -0.1                    | 0.000   | 0.5                  | 0.4                     | 0.6     | 0.000   | -0.4                    | -0.4 | -0.3 | 0.000 |
| <b>Presence of children</b>      |                       |         |                         |         |                      |                         |         |         |                         |      |      |       |
| Presence vs. Absence             | -0.2                  | -0.2    | -0.1                    | 0.000   | 1.4                  | 1.3                     | 1.6     | 0.000   | -0.3                    | -0.4 | -0.2 | 0.000 |
| <b>Race/ethnicity</b>            |                       |         |                         |         |                      |                         |         |         |                         |      |      |       |
| African-American vs. White       | -0.3                  | -0.3    | -0.3                    | 0.000   | 2.1                  | 2.0                     | 2.3     | 0.000   | -1.4                    | -1.5 | -1.3 | 0.000 |
| Hispanic vs. White               | 0.0                   | -0.1    | 0.0                     | 0.223   | -1.1                 | -1.3                    | -0.9    | 0.000   | -0.3                    | -0.4 | -0.1 | 0.000 |
| Other vs. White                  | -0.2                  | -0.2    | -0.1                    | 0.000   | -0.8                 | -1.0                    | -0.5    | 0.000   | -0.7                    | -0.8 | -0.5 | 0.000 |
| <b>Income</b>                    |                       |         |                         |         |                      |                         |         |         |                         |      |      |       |
| Middle vs. Low Income            | 0.1                   | 0.1     | 0.1                     | 0.000   | -1.0                 | -1.0                    | -0.9    | 0.000   | 0.4                     | 0.4  | 0.5  | 0.000 |
| High vs. Low Income              | 0.3                   | 0.3     | 0.3                     | 0.000   | -2.3                 | -2.4                    | -2.2    | 0.000   | 1.0                     | 0.9  | 1.0  | 0.000 |

---

**Race/ethnicity-Presence of children**

## No Children

|                            |      |      |      |       |      |      |      |       |      |      |      |       |
|----------------------------|------|------|------|-------|------|------|------|-------|------|------|------|-------|
| African-American vs. White | -0.3 | -0.3 | -0.3 | 0.000 | 2.3  | 2.1  | 2.5  | 0.000 | -1.5 | -1.6 | -1.4 | 0.000 |
| Hispanic vs. White         | 0.0  | -0.1 | 0.0  | 0.258 | -1.2 | -1.5 | -0.9 | 0.000 | -0.2 | -0.4 | -0.1 | 0.001 |
| Other vs. White            | -0.2 | -0.3 | -0.2 | 0.000 | -0.8 | -1.2 | -0.5 | 0.000 | -0.7 | -0.9 | -0.5 | 0.000 |

## Children

|                            |      |      |      |       |      |      |      |       |      |      |      |       |
|----------------------------|------|------|------|-------|------|------|------|-------|------|------|------|-------|
| African-American vs. White | -0.2 | -0.3 | -0.2 | 0.000 | 1.7  | 1.4  | 1.9  | 0.000 | -1.1 | -1.3 | -1.0 | 0.000 |
| Hispanic vs. White         | 0.0  | -0.1 | 0.0  | 0.523 | -0.8 | -1.1 | -0.6 | 0.000 | -0.3 | -0.4 | -0.1 | 0.000 |
| Other vs. White            | -0.1 | -0.2 | 0.0  | 0.042 | -0.5 | -0.9 | -0.2 | 0.005 | -0.7 | -0.9 | -0.5 | 0.000 |

---

**Race/ethnicity-Income**

## Low income

|                            |      |      |      |       |      |      |      |       |      |      |      |       |
|----------------------------|------|------|------|-------|------|------|------|-------|------|------|------|-------|
| African-American vs. White | -0.3 | -0.3 | -0.2 | 0.000 | 1.9  | 1.6  | 2.2  | 0.000 | -1.3 | -1.5 | -1.1 | 0.000 |
| Hispanic vs. White         | 0.0  | -0.1 | 0.0  | 0.368 | -1.0 | -1.3 | -0.6 | 0.000 | -0.3 | -0.5 | 0.0  | 0.020 |
| Other vs. White            | -0.1 | -0.2 | 0.0  | 0.168 | -0.7 | -1.2 | -0.2 | 0.005 | -0.5 | -0.8 | -0.2 | 0.001 |

## Middle income

|                            |      |      |      |       |      |      |      |       |      |      |      |       |
|----------------------------|------|------|------|-------|------|------|------|-------|------|------|------|-------|
| African-American vs. White | -0.3 | -0.3 | -0.2 | 0.000 | 2.1  | 1.8  | 2.3  | 0.000 | -1.4 | -1.5 | -1.3 | 0.000 |
| Hispanic vs. White         | 0.0  | -0.1 | 0.1  | 0.970 | -1.4 | -1.7 | -1.1 | 0.000 | -0.2 | -0.4 | -0.1 | 0.006 |
| Other vs. White            | -0.2 | -0.2 | -0.1 | 0.000 | -1.0 | -1.3 | -0.7 | 0.000 | -0.6 | -0.8 | -0.4 | 0.000 |

## High Income

|                            |      |      |      |       |      |      |      |       |      |      |      |       |
|----------------------------|------|------|------|-------|------|------|------|-------|------|------|------|-------|
| African-American vs. White | -0.3 | -0.3 | -0.2 | 0.000 | 2.4  | 2.1  | 2.6  | 0.000 | -1.5 | -1.6 | -1.3 | 0.000 |
| Hispanic vs. White         | 0.0  | -0.1 | 0.0  | 0.097 | -0.8 | -1.1 | -0.5 | 0.000 | -0.3 | -0.5 | -0.1 | 0.000 |
| Other vs. White            | -0.2 | -0.3 | -0.2 | 0.000 | -0.5 | -0.8 | -0.2 | 0.002 | -0.9 | -1.0 | -0.7 | 0.000 |

---

\* Coefficients can be interpreted as the change in the percent of grocery expenditure (volume purchased, gr/d) on each type of food respect to the total purchases of foods. Changes with time, presence of different family members by age and gender, presence of children, race/ethnicity, income, and the interactions race/ethnicity with presence of children and income are shown.

† LCS, low-caloric sweetened beverages or foods; CS, caloric-sweetened beverages or foods.

‡ Significance level:  $P < 0.001$

---
